# Supplementary material for: Complement inhibition enables tumor delivery of LCMV glycoprotein pseudotyped viruses in the presence of antiviral antibodies
Source: PubMed Central journal article supplement — Mol Ther Oncolytics. 2016 Nov 16;3:16027–. doi: 10.1038/mto.2016.27 (PMC5111574; doi:10.1038/mto.2016.27), 2016-11-16
Supplement: mto201627-s2.pdf [file mto201627-s2.pdf]

**A**

MG1 GFP infection of 13762 MAT B III cells (images taken 48hpi)

Uninfected cells

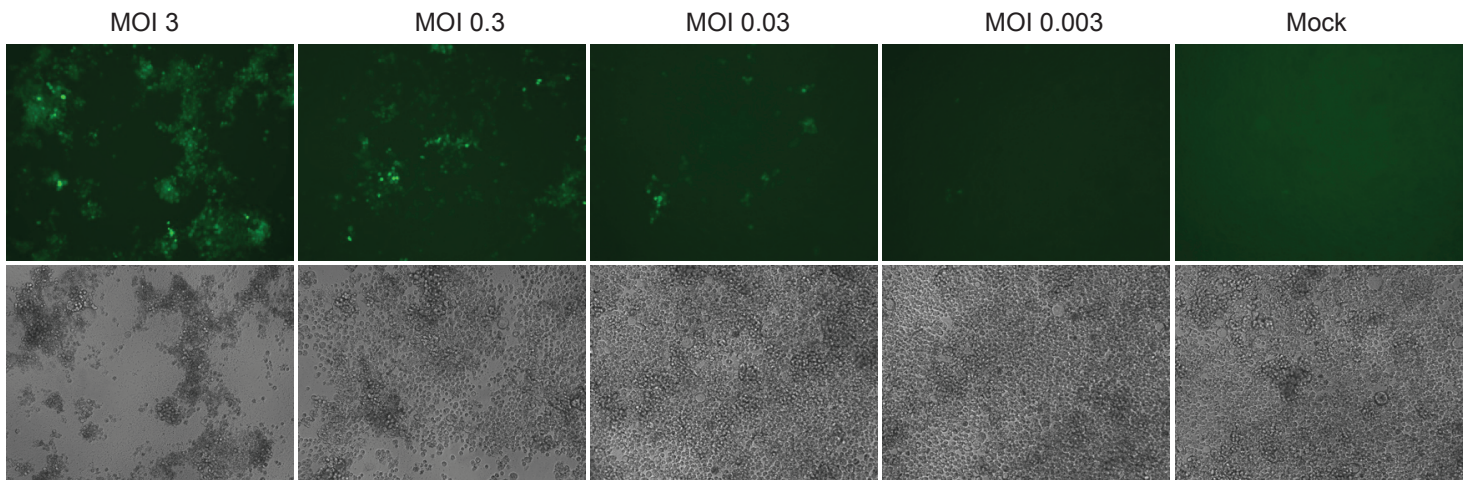

MRB LCMV GP infection of 13762 MAT B III cells (images taken 48hpi)

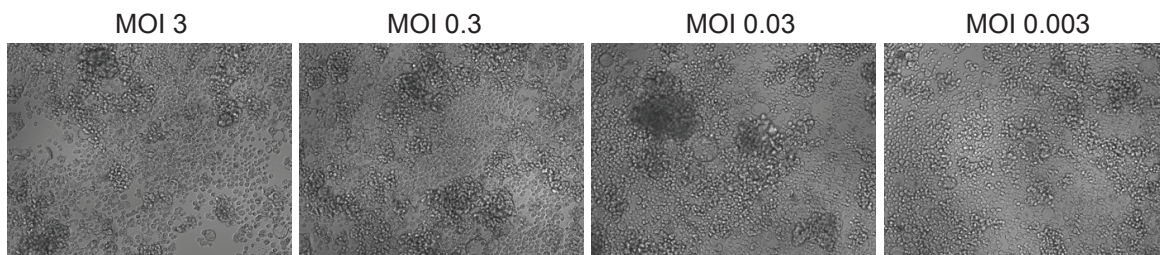

**B**

MG1 and MRB LCMV GP replication in Vero cells

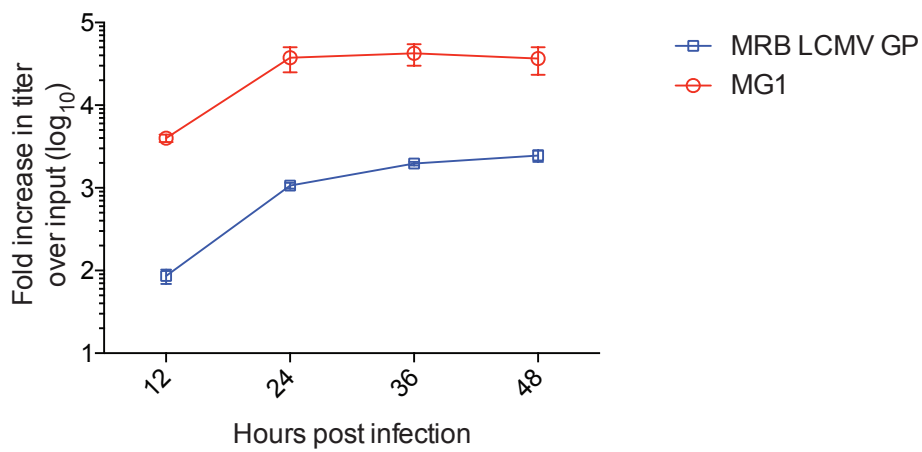

Supplemental Figure 2.
