# Supplementary figures and images for: Complement inhibition enables tumor delivery of LCMV glycoprotein pseudotyped viruses in the presence of antiviral antibodies
Source: PubMed Central journal article supplement — Mol Ther Oncolytics. 2016 Nov 16;3:16027–. doi: 10.1038/mto.2016.27 (PMC5111574; doi:10.1038/mto.2016.27), 2016-11-16

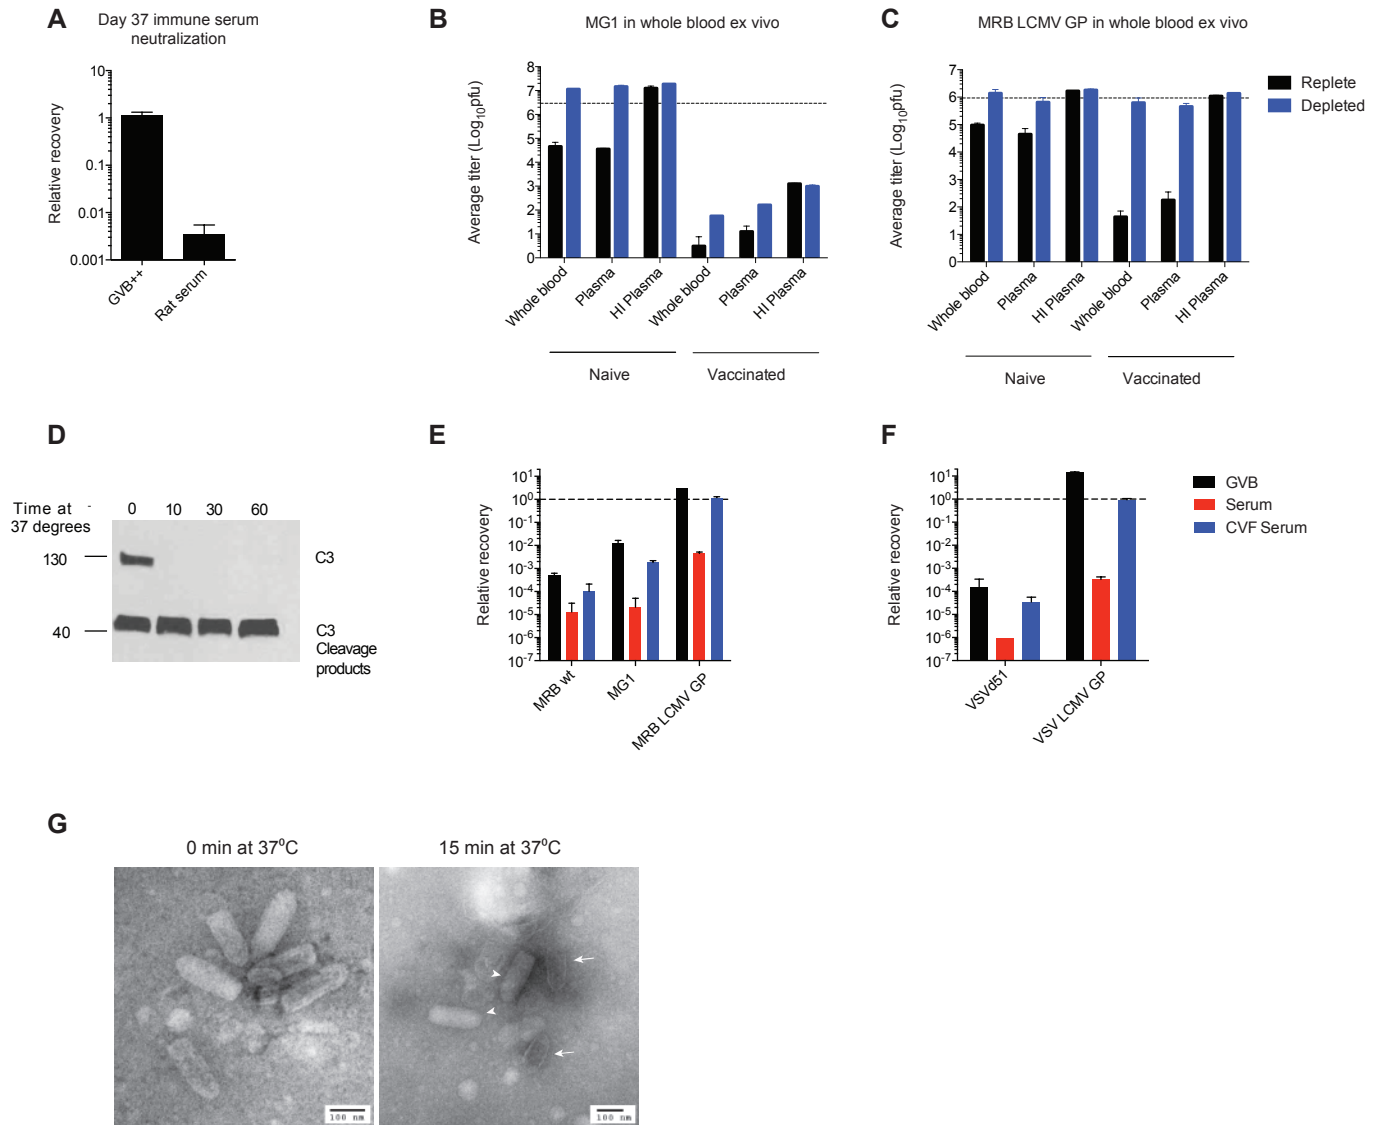

Supplemental Figure 1.

Supplement: mto201627-s1.pdf [file mto201627-s1.pdf]
